# Supplementary figures and images for: p16INK4a, a Senescence Marker, Influences Tenofovir/Emtricitabine Metabolite Disposition in HIV‐Infected Subjects
Source: PubMed Central journal article supplement — CPT Pharmacometrics Syst Pharmacol. 2016 Dec 26;6(2):120–7. doi: 10.1002/psp4.12150 (PMC5321809; doi:10.1002/psp4.12150), 2016-12-26

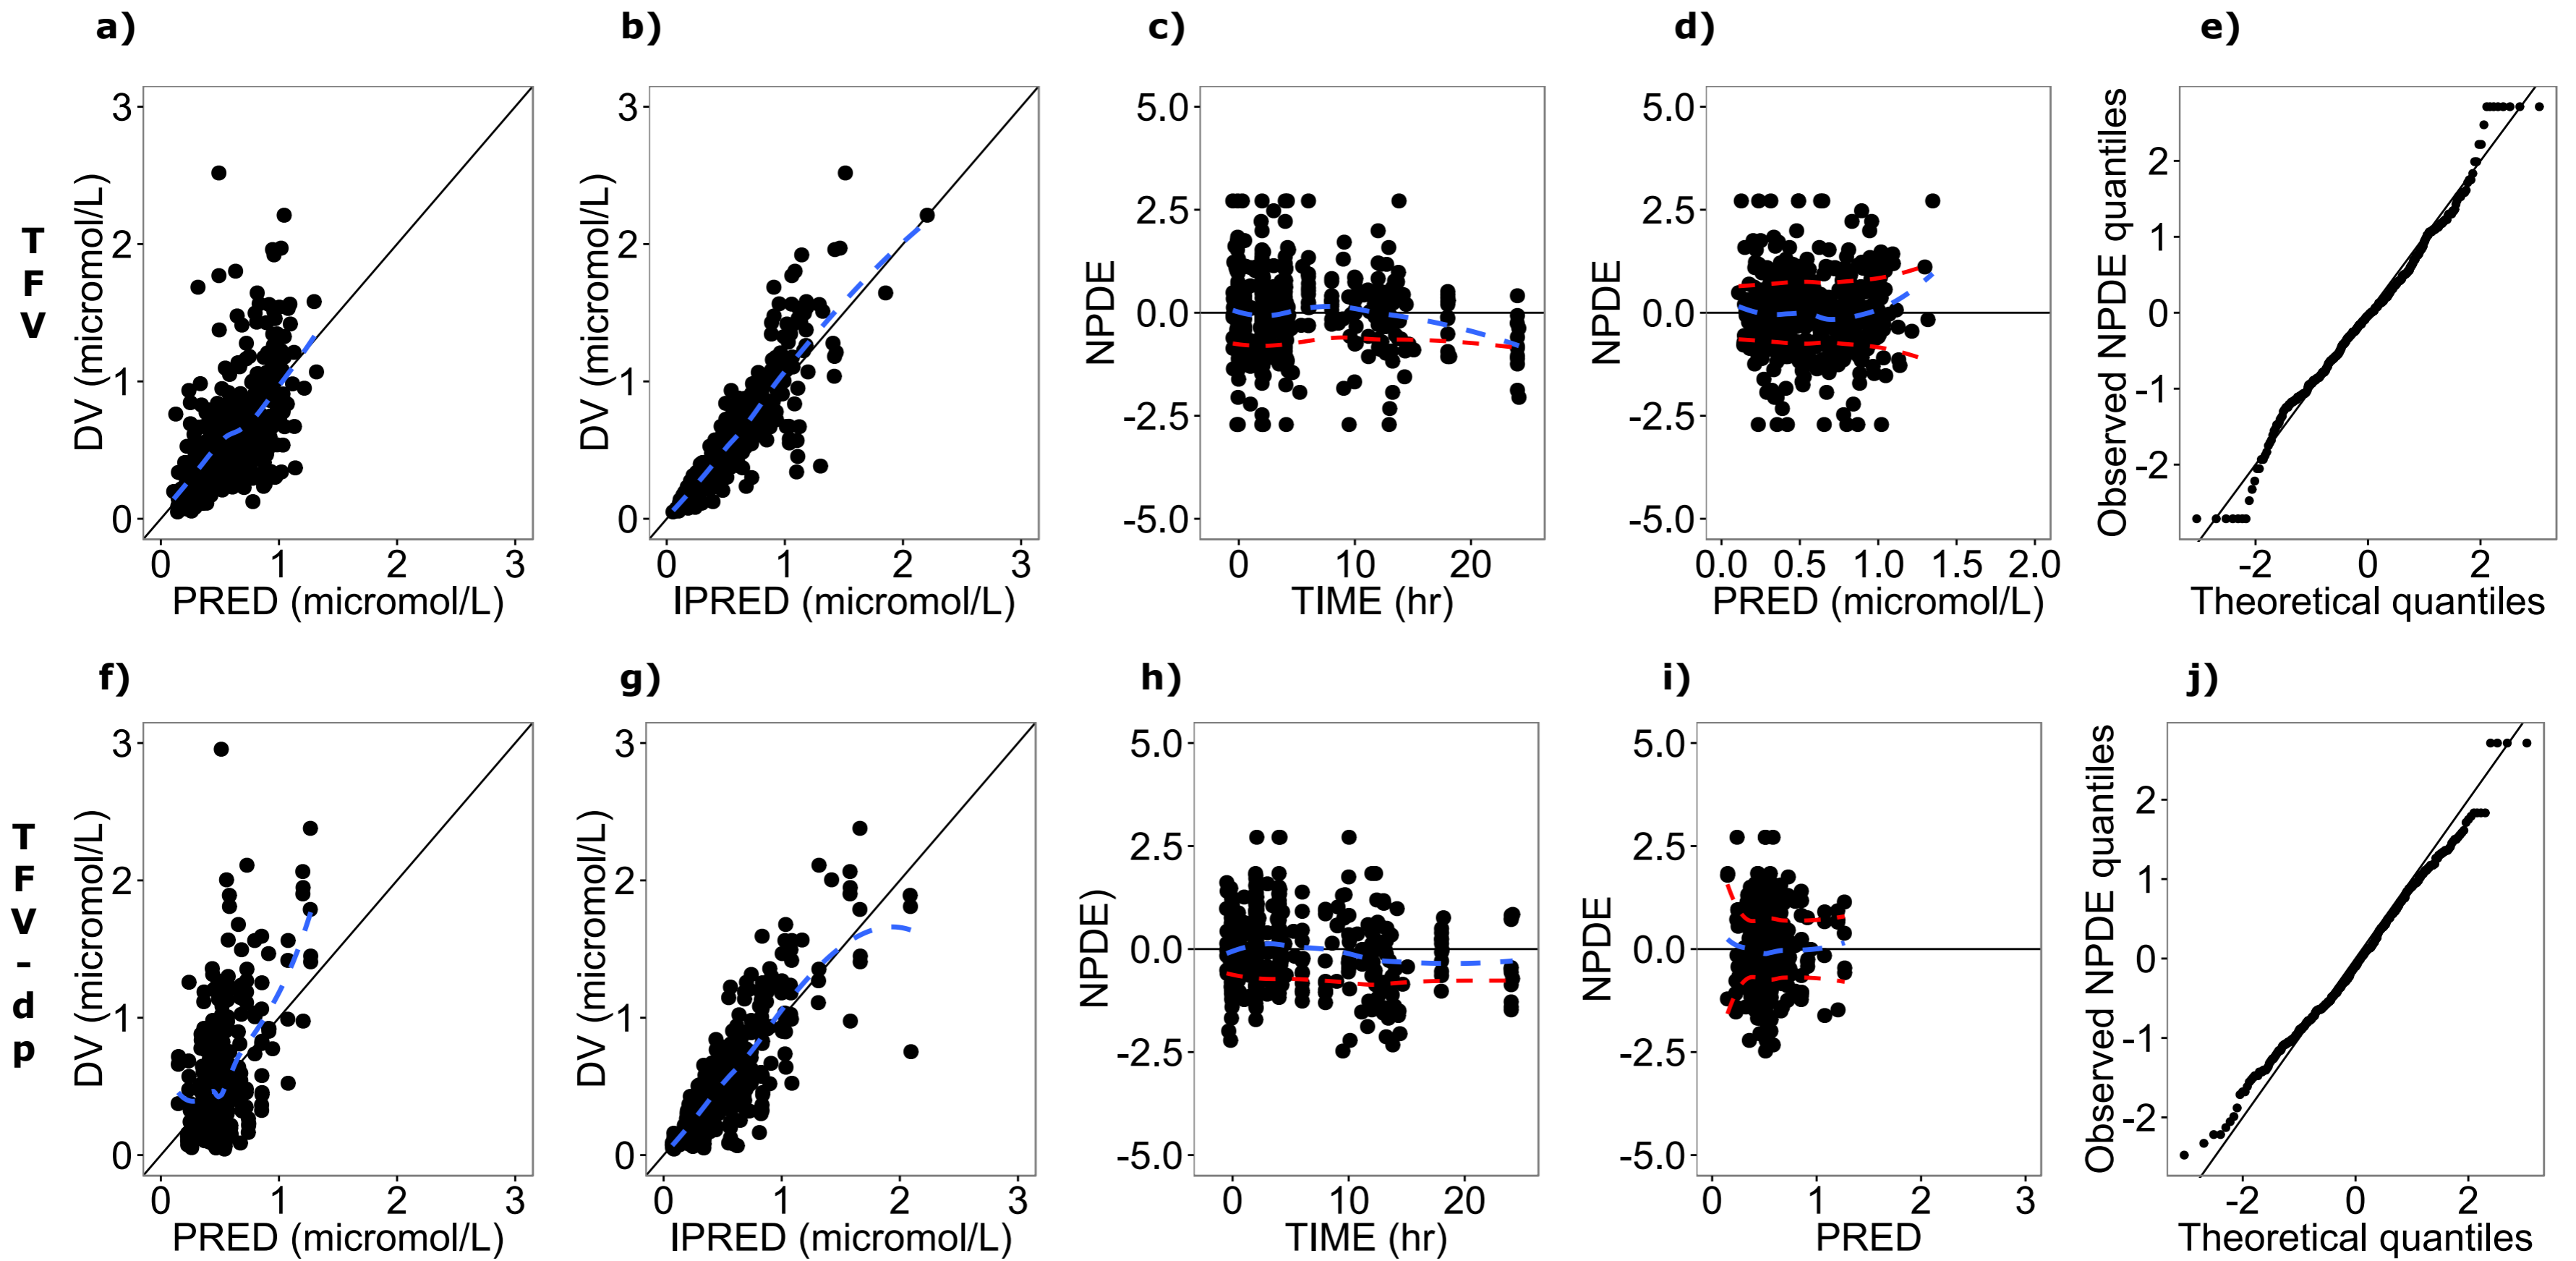

Supplement: PSP4-6-120-s002.pdf [file PSP4-6-120-s002.pdf]

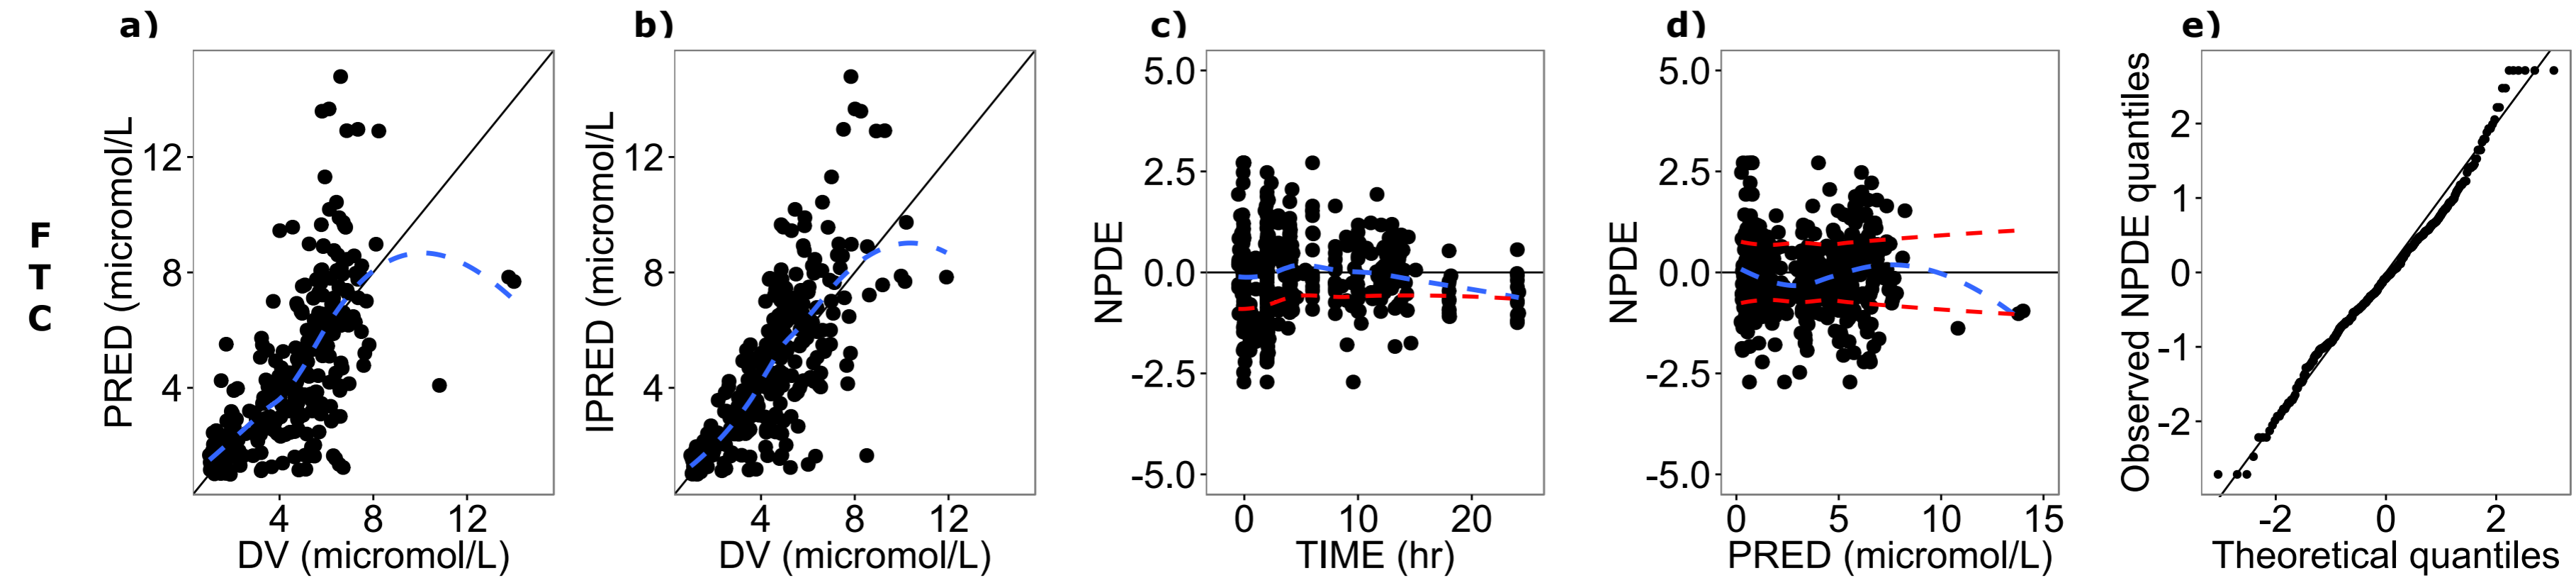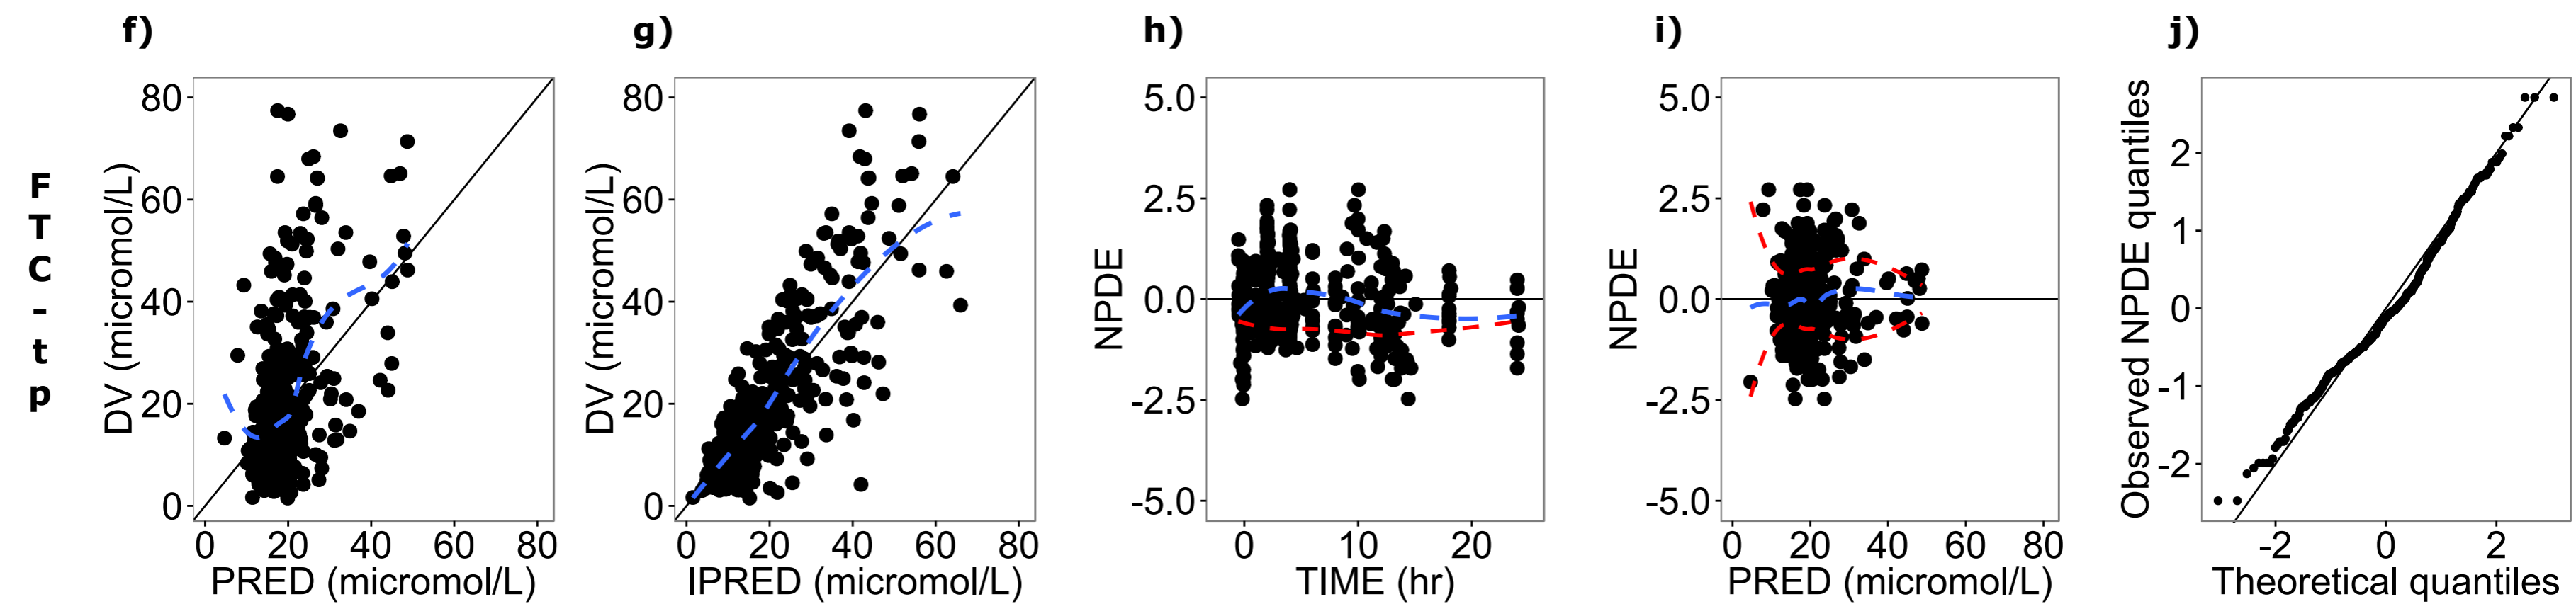

Supplement: PSP4-6-120-s003.pdf [file PSP4-6-120-s003.pdf]
